# Supplementary material
Source: PubMed Central journal article supplement (PMC3993460)
Supplement: IAI.01397-13_zii005140627so1.pdf [file IAI.01397-13_zii005140627so1.pdf]

1  
2  
3  
4  
5  
6  
7  
8  
9  
10  
11  
12  
13  
14

(A)

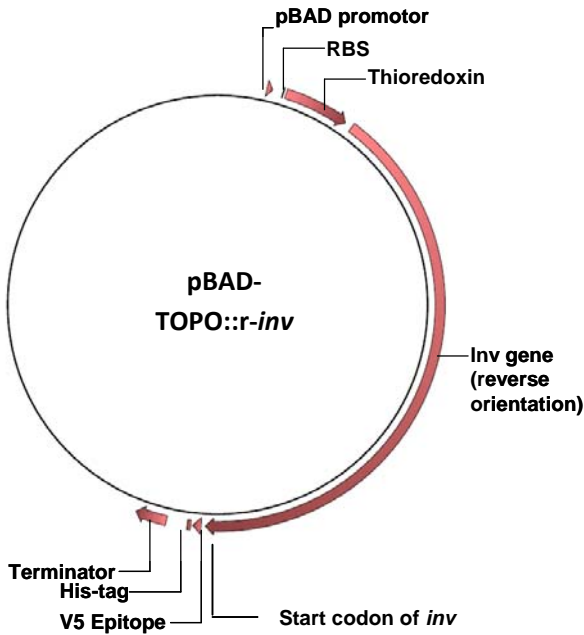

(B)

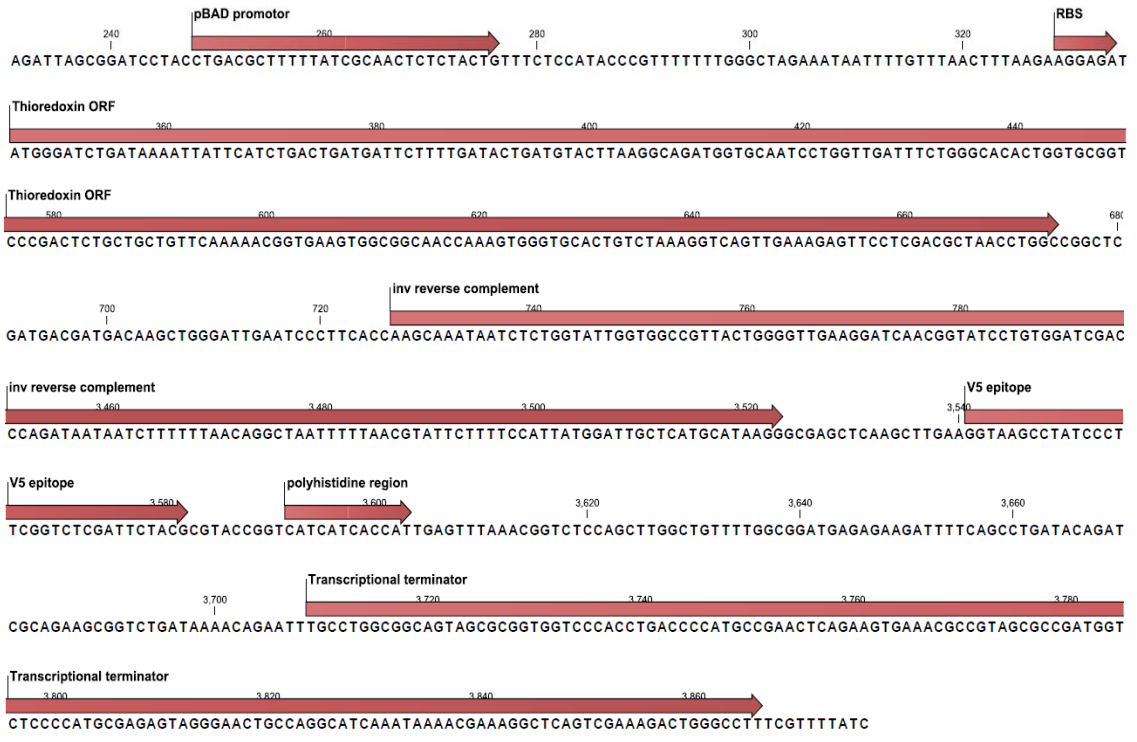

15 **Supplementary Figure 1.** Anti-sense *inv* expressing plasmid. (A) Schematic representation of  
16 the antisense *inv* expression plasmid pBAD TOPO::*r-inv*. Solid arrows show arrangement of the  
17 pBAD promotor, ribosome binding site (RBS), thioredoxin gene, *r-inv* gene, His tag, terminator  
18 region in pBAD TOPO and arrow head shows the direction of transcription. (B) Nucleotide  
19 sequence (starting from the promotor region of pBAD TOPO plasmid) of the recombinant *inv*  
20 gene in antisense expression plasmid pBAD TOPO.

21

22

23

24

25

26

27

28

29

30

31

32

33

34 (A)

35

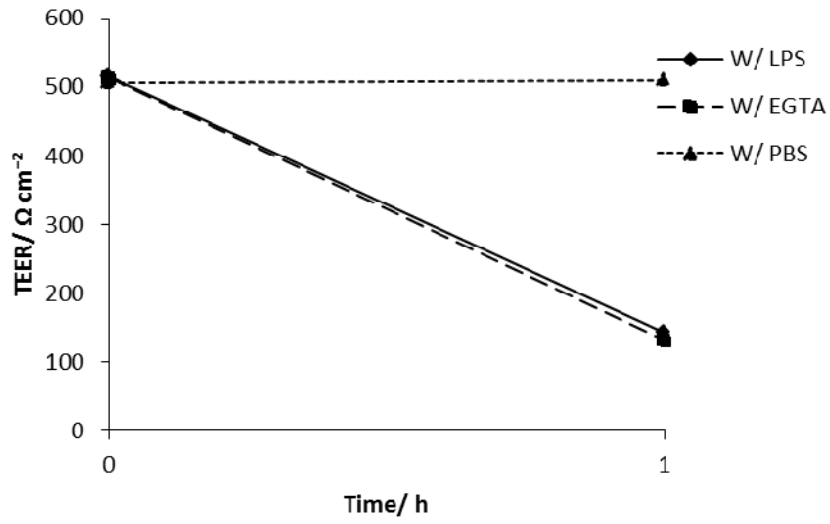

36

37

38

(B)

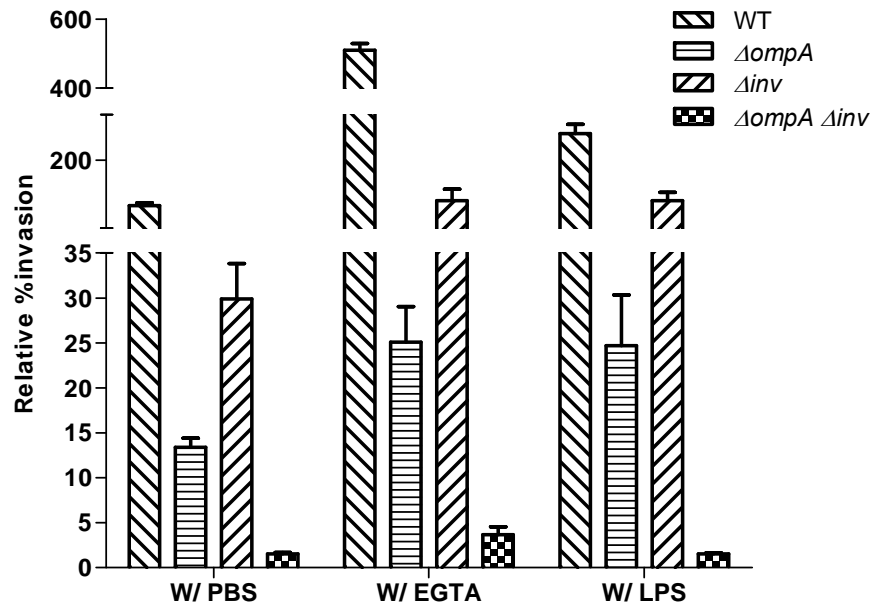

39

40

41 **Supplementary Figure 2.** Basolateral invasion of *C.sakazakii*. (A) Trans epithelial electrical  
42 resistance of LPS or EGTA or PBS pre-treated Caco-2 monolayers. (B) Invasion of *C. sakazakii*  
43 into Caco-2 cells (14 days old) in trans-well filters after pretreatment with PBS (5 mM/ well) or  
44 EGTA (5 mM/well) or LPS (10 ng/well). The data represent relative percents invasion  $\pm$  SD from  
45 at least three independent experiments performed in duplicate, compared to the invasion of WT  
46 to EGTA-untreated Caco-2 cells at 14 days old.

47

48

49

50

51

52

53

54

55

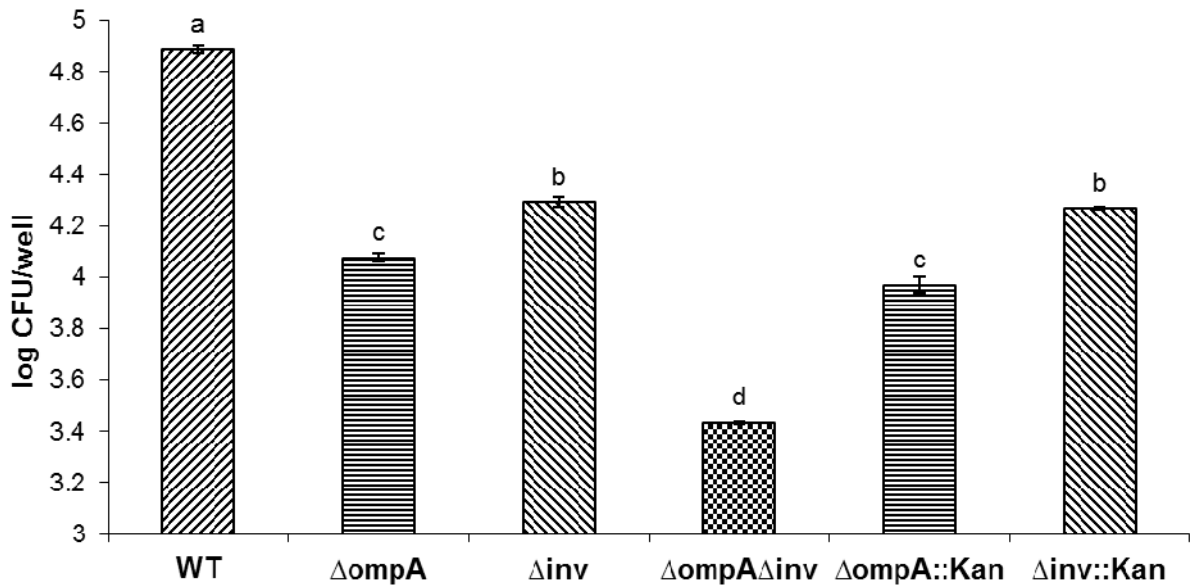

56  
57

58 **Supplementary Figure 3.** Invasion of *C. sakazakii*  $\Delta ompA::Kan^R$  and  $\Delta inv::Kan^R$  mutants into  
 59 Caco-2 cell (4 to 7 days old) monolayers. The data represent relative percentage of invasion  $\pm$   
 60 SD from at least three independent experiments performed in duplicate. Values of *P* below 0.05  
 61 were considered as significantly different and relative percent invasion indicated with same  
 62 lowercase letter are not significantly different.

63  
64  
65  
66  
67  
68  
69  
70  
71
